# Supplementary material for: Molecular Docking and In-Silico Analysis of Natural Biomolecules against Dengue, Ebola, Zika, SARS-CoV-2 Variants of Concern and Monkeypox Virus
Source: MDPI journal article supplement (doi:10.3390/ijms231911131), 2022-09-22
Supplement: s1 [file s1]

**Table S1.** Ligands (biomolecules) and cellular virus receptors subjected to molecular docking in the experiment.

| Ligand |                         | Source                                         | Molecule type                        |
|--------|-------------------------|------------------------------------------------|--------------------------------------|
| PDB ID | Name                    |                                                |                                      |
| 2MVI   | Bacteriocin plantaricin | <i>Lactobacillus plantarum</i>                 | Bacterial AMP                        |
|        | ASM1                    | <i>Lactobacillus plantarum</i>                 | Bacterial AMP                        |
| 2KUY   | Bacteriocin glycocin F  |                                                | Bacterial AMP                        |
| 2JPK   | Bacteriocin lactococcin | <i>Lactococcus lactis</i>                      | Bacterial AMP                        |
|        | G                       | <i>Lactococcus lactis</i>                      | Bacterial AMP                        |
| 5XHB   | Nisin                   |                                                | Bacterial AMP                        |
| 1AJ1   | Gardimycin              | <i>Actinoplanesgar badinensis</i>              |                                      |
| 1JMK   | Surfactin               | <i>Bacillus subtilis</i>                       |                                      |
| 2R69   | Fab 1A1D-2              |                                                | DENV neutralizing antibody           |
| 5JHL   | 2A10G6 Fab              |                                                | ZIKV neutralizing antibody           |
| 5FHB   | mAb100                  | Human immune system                            | EBOV neutralizing antibody           |
| 7JMX   | COVA1-16 Fab            |                                                | SARS-CoV-2 neutralizing antibody     |
| 1SL4   | DC-SIGN                 | Mammalian immune system dendritic cells        | Cell antigen receptor for DENV       |
| 5U6B   | AXL                     | Mammalian bone marrow stroma and myeloid cells | Cell antigen receptor for ZIKV       |
| 2OR8   | TIM-1                   | Mammalian immune system T cells                | Cell antigen receptor for EBOV       |
| 7JMX   | ACE2                    | Mammalian system cells                         | Cell antigen receptor for SARS-CoV-2 |
| 3J0A   | Toll-like receptor 5    |                                                | Hypothetical cell antigen            |
| 4M76   | CR3/Mac-1               | Mammalian system cells                         | receptor for MPV                     |

|                  |                 |                                |                                |
|------------------|-----------------|--------------------------------|--------------------------------|
| 5LGD             | CD36            |                                |                                |
| 1H9V             | FcγRIIA         |                                |                                |
| <b>Conformer</b> |                 |                                |                                |
| <b>ID</b>        |                 |                                |                                |
| 145996610        | Molnupiravir    | -                              | Anti-SARS-cov-2 drug           |
|                  |                 | -                              | candidate                      |
| 121304016        | Remdesivir      | -                              | Anti-EBOV drug candidate       |
| 45375808         | Sofosbuvir      | -                              | Anti-DENV and anti-ZIKV        |
|                  |                 |                                | drug candidate                 |
| 483477           | Brincidofovir   |                                | Antiviral drug for human MPV   |
| 16124688         | Tecovirimat     | -                              | Antiviral drug for human MPV   |
| 11787114         | Silvestrol      | <i>Aglaia</i> spp.             | Phytochemical compound         |
| 5318517          | Andrographolide | <i>Andrographis paniculata</i> | Phytochemical compound         |
| 10032587         | Lyngbyabellin A | Cyanobacteria                  | Bacterial secondary metabolite |
| 21671525         | Hapalindole H   | Cyanobacteria                  | Bacterial secondary metabolite |

SARS-CoV-2: Severe acute respiratory syndrome coronavirus 2; DENV: Dengue virus; EBOV: Ebola virus; ZIKV: Zika virus; DC-SIGN: Dendritic Cell-Specific Intercellular adhesion molecule-3-Grabbing Non-integrin; AXL: AXL Receptor Tyrosine Kinase; TIM-1: T-cell immunoglobulin and mucin domain 1; ACE2: angiotensin converting enzyme 2; Antimicrobial peptide: AMP
